# Supplementary material for: Emergence of planar cell polarity from the interplay of local interactions and global gradients
Source: eLife journal article supplement (doi:10.7554/elife.84053), 2024-10-24

Polarity as function of gradient for different noise amplitude

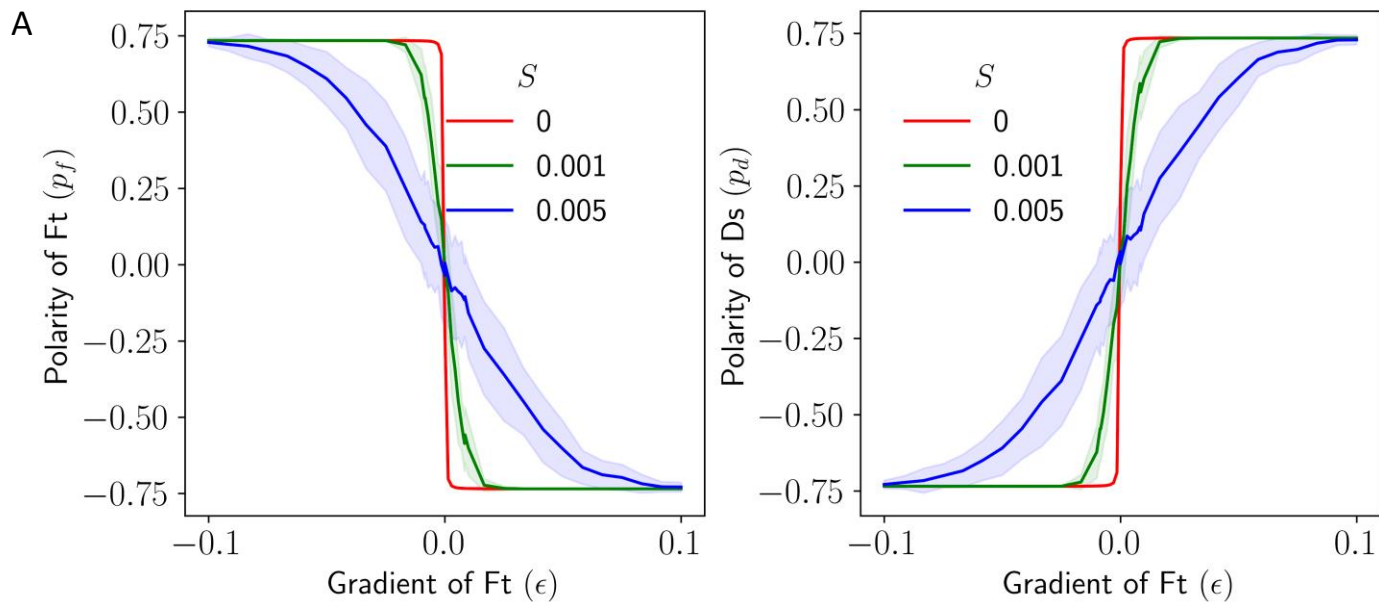

**B** Effect of noise in presence and absence of gradient

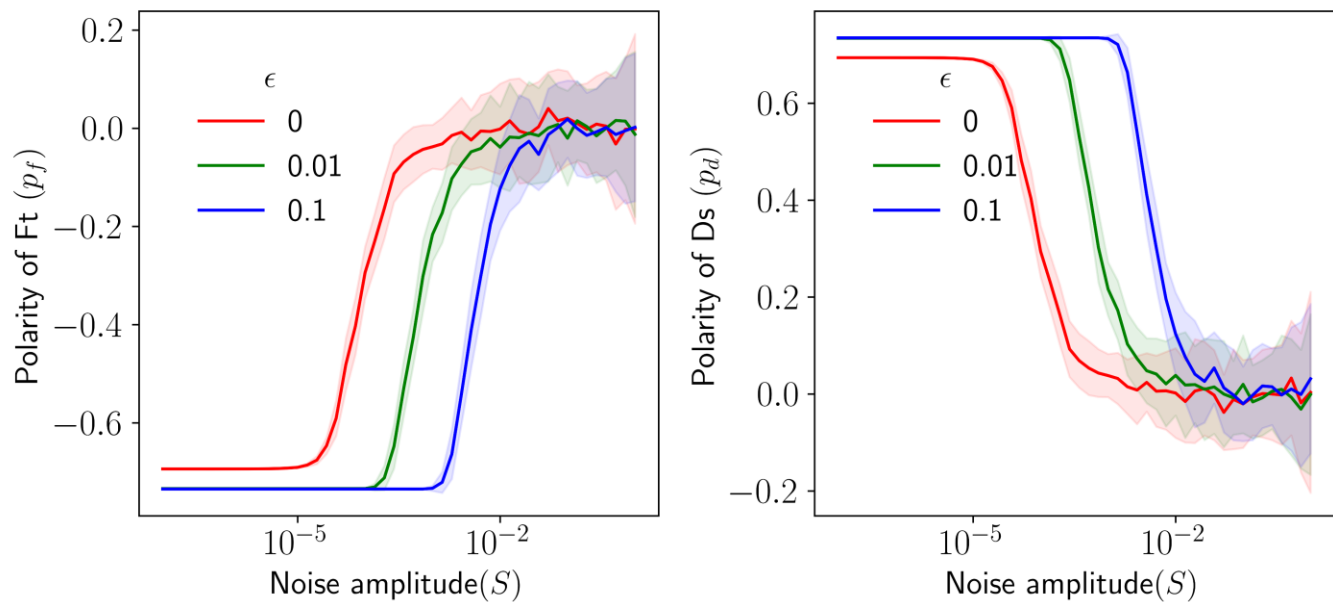

Supplement: supp [file elife-84053-supp-v1.zip]
