# Supplementary figures and images for: Emergence of planar cell polarity from the interplay of local interactions and global gradients
Source: eLife journal article supplement (doi:10.7554/elife.84053), 2024-10-24

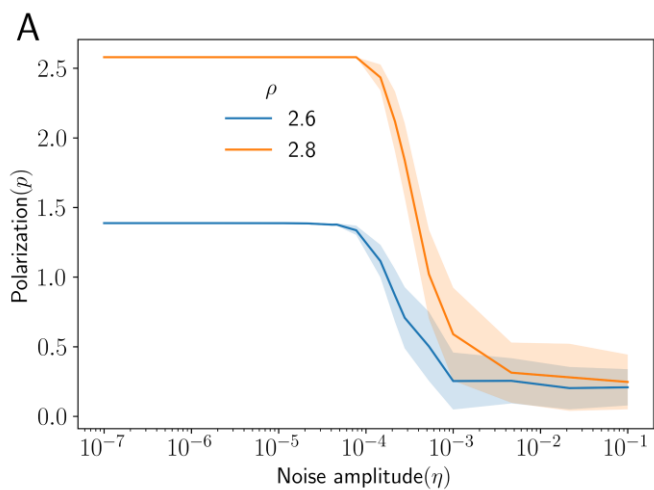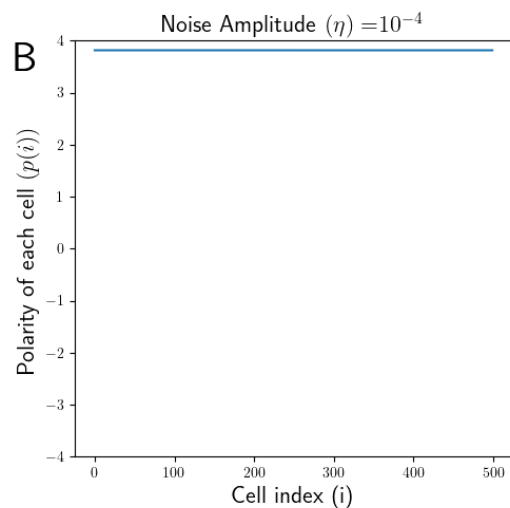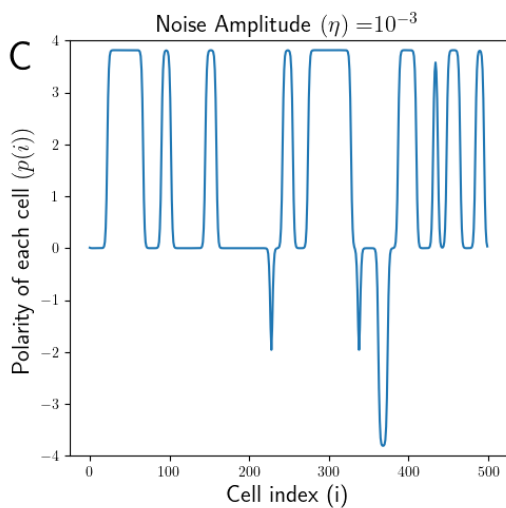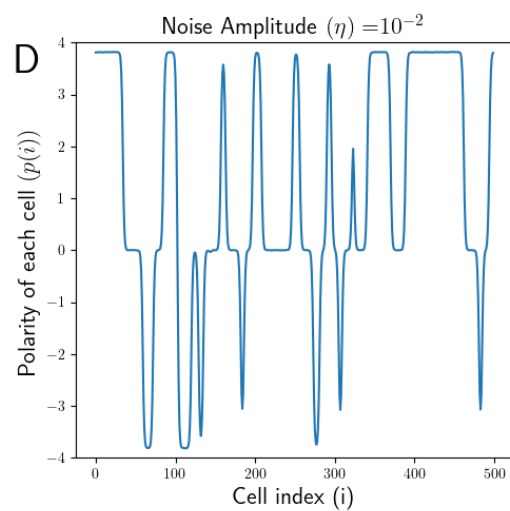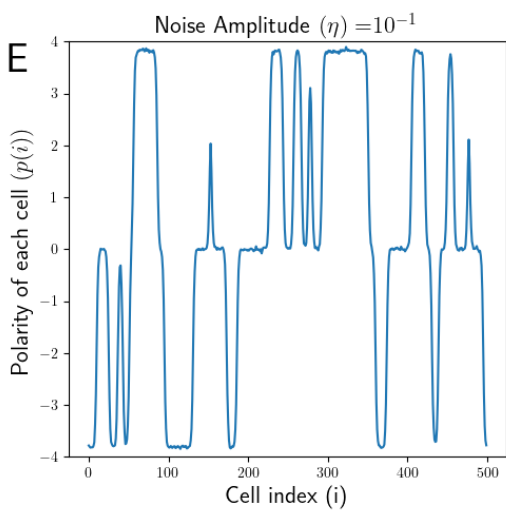

Supplement: supp [file elife-84053-supp-v1.zip]

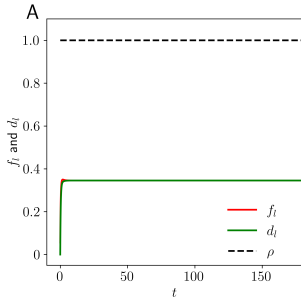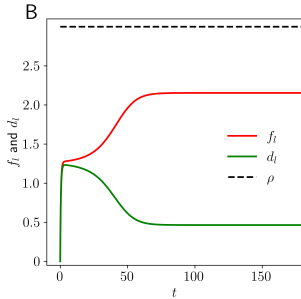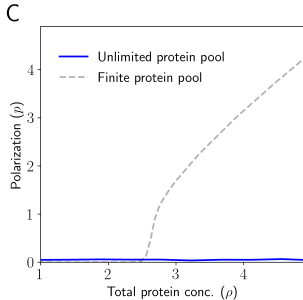

Supplement: supp [file elife-84053-supp-v1.zip]

A

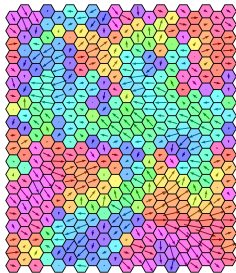

B

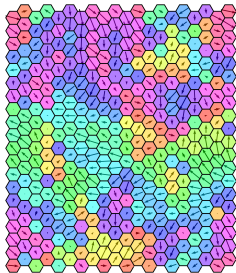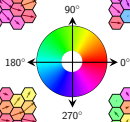

C

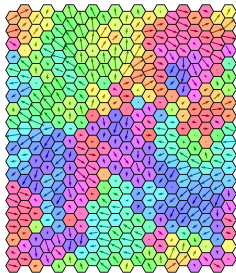

D

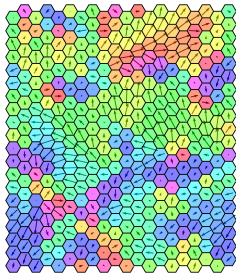

Supplement: supp [file elife-84053-supp-v1.zip]

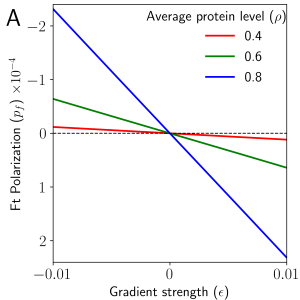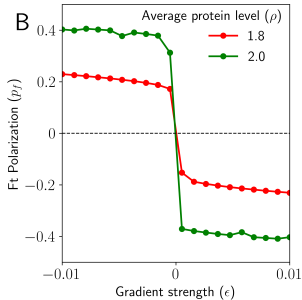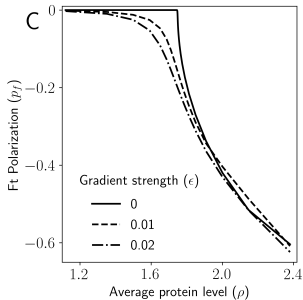

Supplement: supp [file elife-84053-supp-v1.zip]

$|\nabla \times \mathbf{p}|$  $|\nabla \cdot \mathbf{p}|$ 

A

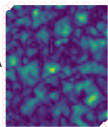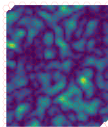

B

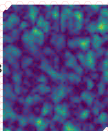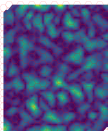

C

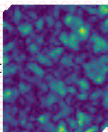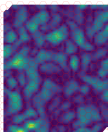

D

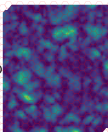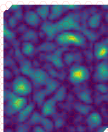Low  High

Supplement: supp [file elife-84053-supp-v1.zip]

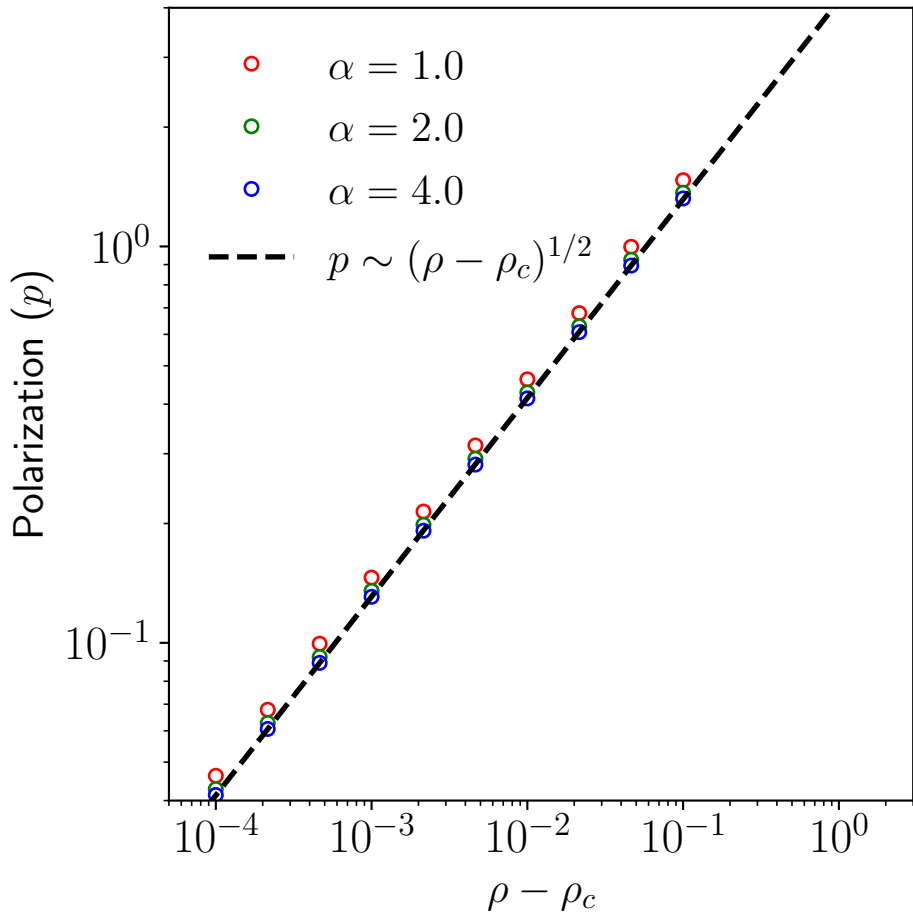

Supplement: supp [file elife-84053-supp-v1.zip]
